# Supplementary material
Source: PubMed Central journal article supplement (PMC4959096)
Supplement: supp_116.232561_Supplemental_232561.pdf [file supp_116.232561_Supplemental_232561.pdf]

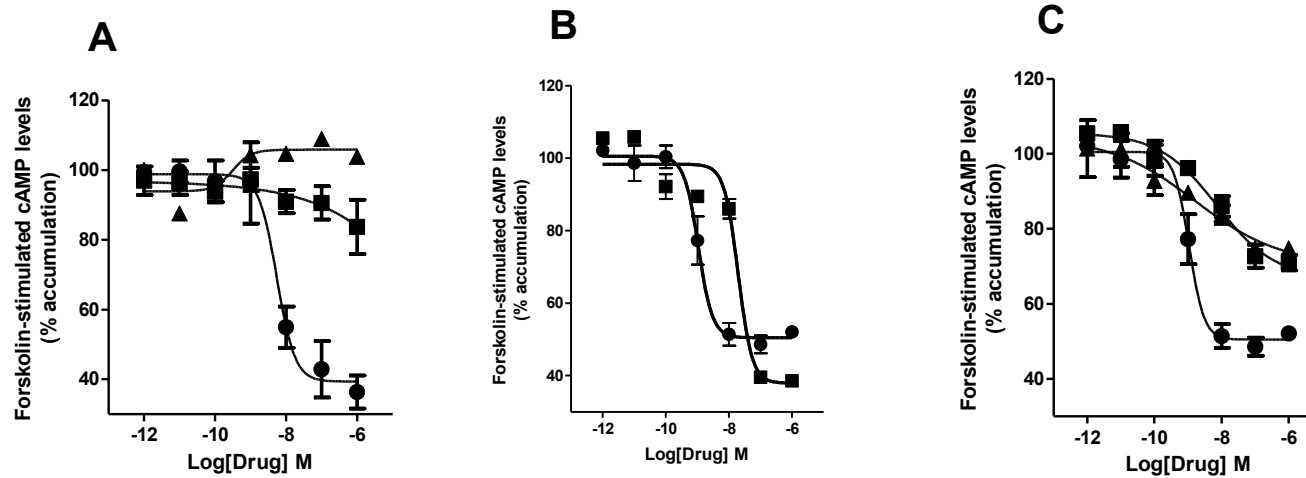

**Fig. 1**

**Supplementary Fig 1.** Cyclase assay: The classical cannabinoids, (A) L759656 (■) and L759633 (▲) failed to significantly affect cAMP levels, while (B) JWH133 (■) ( $EC_{50}$  20 nM) was slightly more efficacious than CP55940 (●) ( $EC_{50}$  5.5 nM) albeit with lower potency. (C) THC (■) ( $EC_{50}$  7 nM) and KM233 (▲) ( $EC_{50}$  1.6 nM) displayed lower efficacy but comparable potency to CP55940 in inhibiting adenylyl cyclase.  $EC_{50}$ s were obtained fitting the dose response curve (nonlinear regression) using GraphPad using GraphPad Prism 4.0. Data represent mean  $\pm$  SEM of at least 3 experiments.

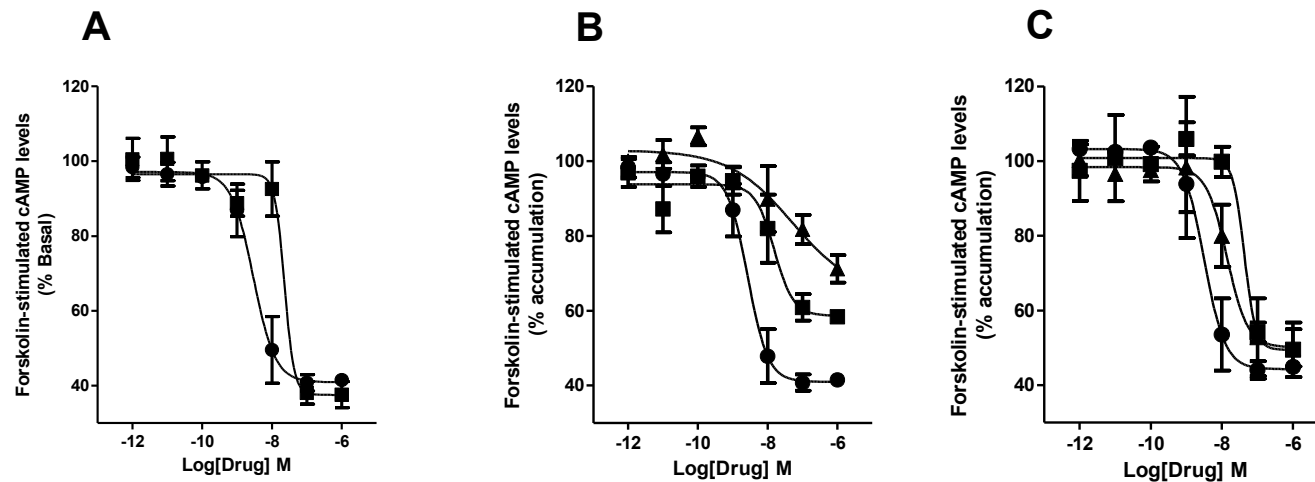

**Fig. 2**

**Supplementary Fig 2.** Cyclase assay: (A) The non-classical cannabinoid, HU308 (■) (EC<sub>50</sub> 30 nM) was less potent than its congener, CP55940 (●) (EC<sub>50</sub> 3 nM). (B) Aminoalkylindoles, WIN55212-2 (■) (EC<sub>50</sub> 20 nM) and STS135 (▲) (EC<sub>50</sub> 52 nM) displayed lower potencies and efficacies compared to CP55940 in the cyclase assay (C) A836339 (■) (EC<sub>50</sub> 43 nM) and GP1a (▲) (EC<sub>50</sub> 14 nM) displayed comparable efficacies as CP55940 in inhibiting adenylyl cyclase but were less potent. EC<sub>50</sub>s were obtained by fitting the dose response curve (nonlinear regression) using GraphPad Prism 4.0. Data represent mean ± SEM of at least 3 experiments.

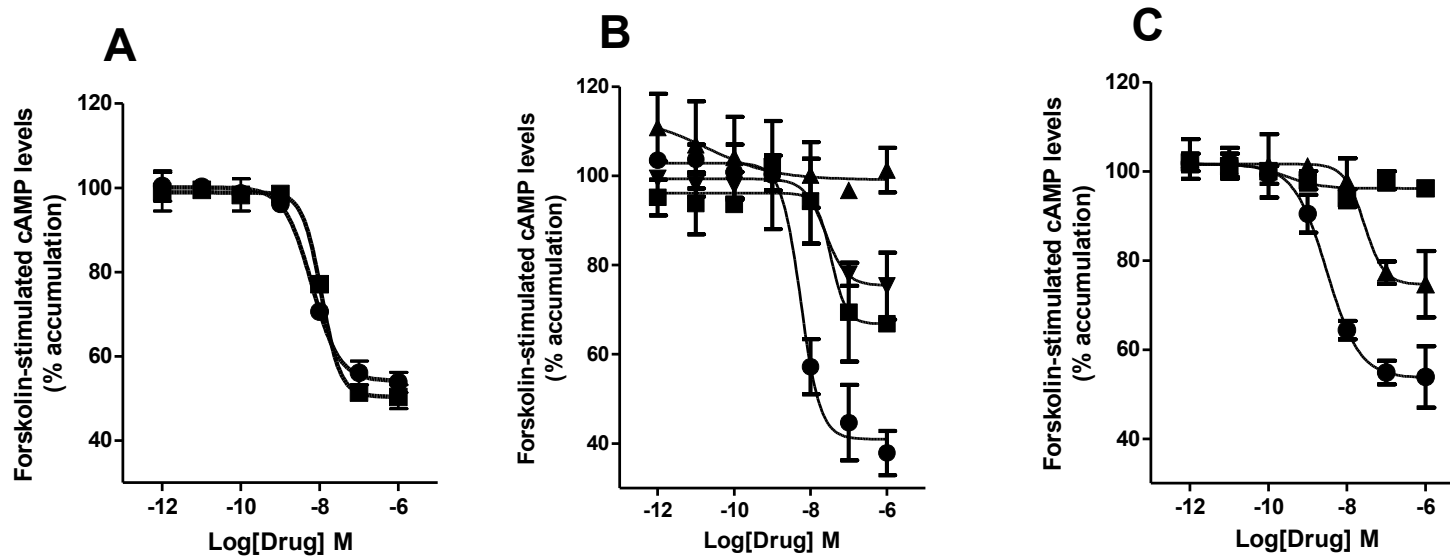

**Fig. 3**

**Supplementary Fig. 3.** Cyclase assay: (A) The cannabilactone, AM1710 (■) ( $EC_{50}$  11nM) was as potent and efficacious as CP55940 (●) ( $EC_{50}$  6 nM) in inhibiting the accumulation of cAMP. (B) The carboxamide SER601 (■) ( $EC_{50}$  40 nM) and the pyrimidine GW833972A (▼) ( $EC_{50}$  of 28 nM) were less potent and efficacious than CP55940, while 4Q3C (▲) failed to elicit any response in cyclase assay (C) The natural product, 4-O-methylhonokiol (■) failed to inhibit accumulation of cAMP, while  $\beta$  caryophyllene (▲) ( $EC_{50}$  30 nM) was a low efficacy agonist.  $EC_{50}$ s were obtained by fitting the dose response curve (nonlinear regression) using GraphPad Prism 4.0. Data represent mean  $\pm$  SEM of at least 3 experiments.

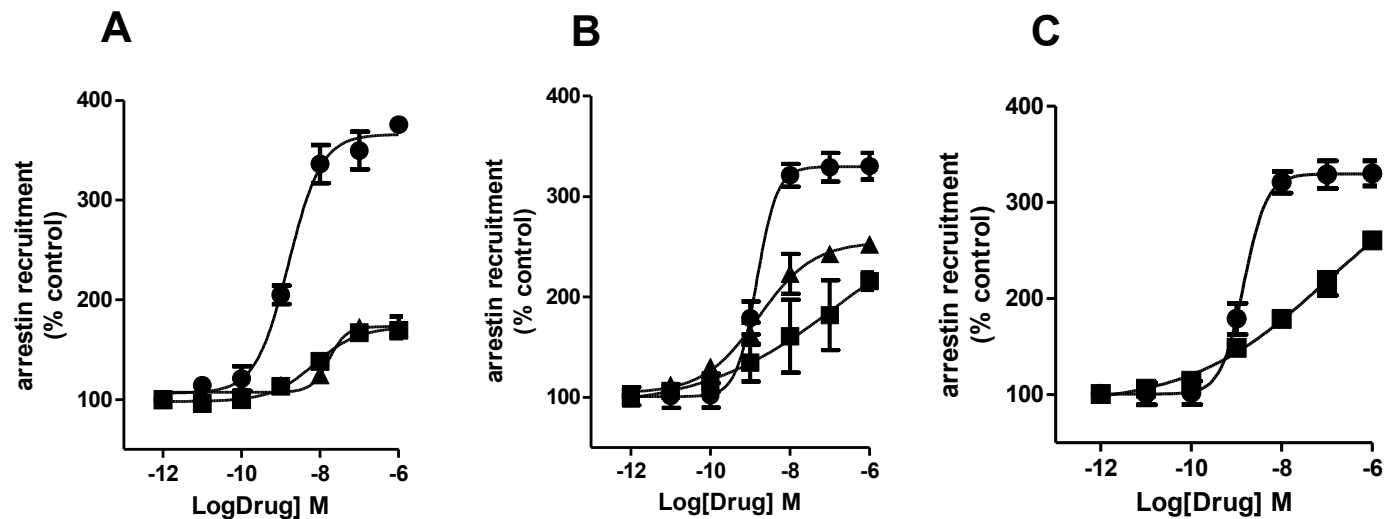

**Fig. 4**

**Supplementary Fig. 4.** Arrestin recruitment assay: (A) Aminoalkylindoles WIN55212-2 (■) ( $EC_{50}$  7.2 nM) and JWH015 (▲) ( $EC_{50}$  160 nM); (B) STS135 (▲) ( $EC_{50}$  1.5 nM) and AM1248 (■) ( $EC_{50}$  71 nM); and (C) UR144 (■) ( $EC_{50}$  95 nM) were low efficacy agonists (with variable potencies and efficacies) compared to CP55940 (●) for arrestin recruitment by the CB2 cannabinoid receptor.  $EC_{50}$ s were obtained by fitting the dose response curve (nonlinear regression) using GraphPad Prism 4.0. Data represent mean  $\pm$  SEM of at least 3 experiments.

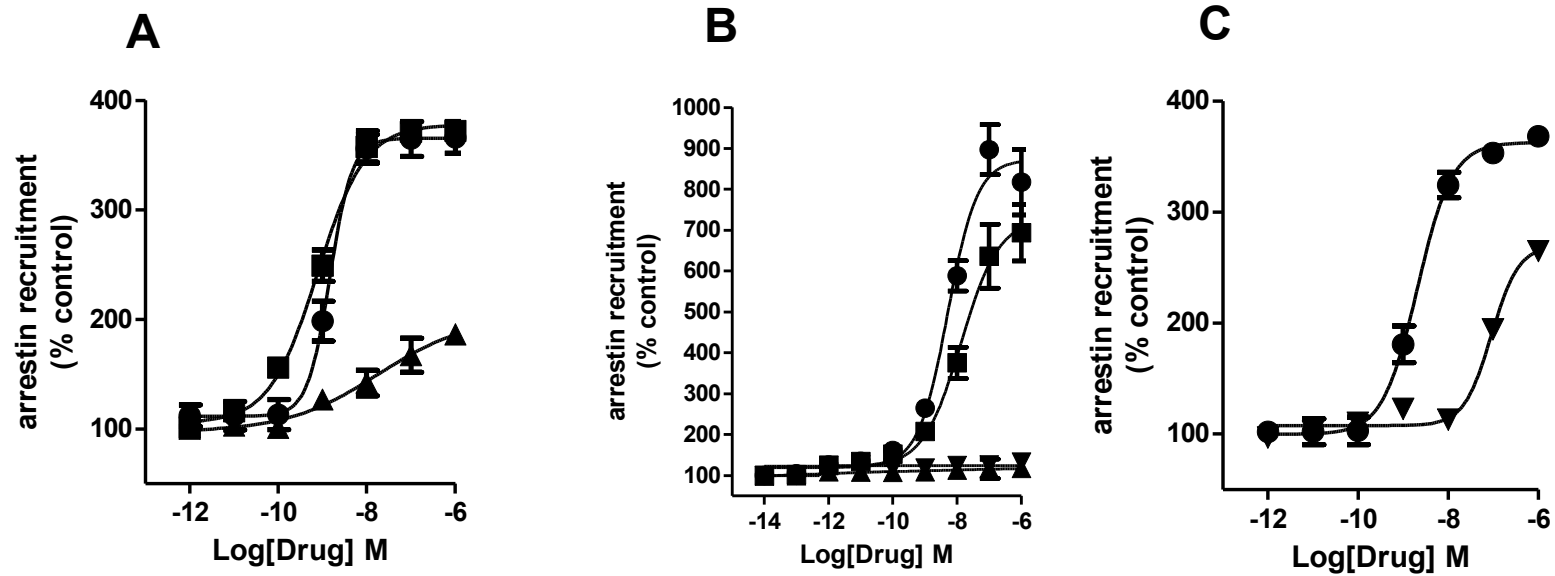

**Fig. 5**

**Supplementary Fig. 5.** Arrestin recruitment assay: (A) A836339 (■) ( $EC_{50}$  0.7 nM) was equipotent and equi-efficacious to CP55940 (●) ( $EC_{50}$  1.5 nM) in recruiting arrestins while, GP1a (▲) ( $EC_{50}$  17 nM) was a low efficacy agonist. (B) AM1710 (■) ( $EC_{50}$  6.7 nM) was as potent and efficacious as CP55940 in recruiting arrestins, but SER601 (▼) and 4Q3C (▲) were inactive. (C) The pyrimidine analogue, GW833972A (▼) ( $EC_{50}$  90 nM), was moderately efficacious, albeit with low potency relative to CP55940, in recruiting arrestins.  $EC_{50}$ s were obtained by fitting the dose response curve (nonlinear regression) using GraphPad Prism 4.0. Data represent mean  $\pm$  SEM of at least 3 experiments.

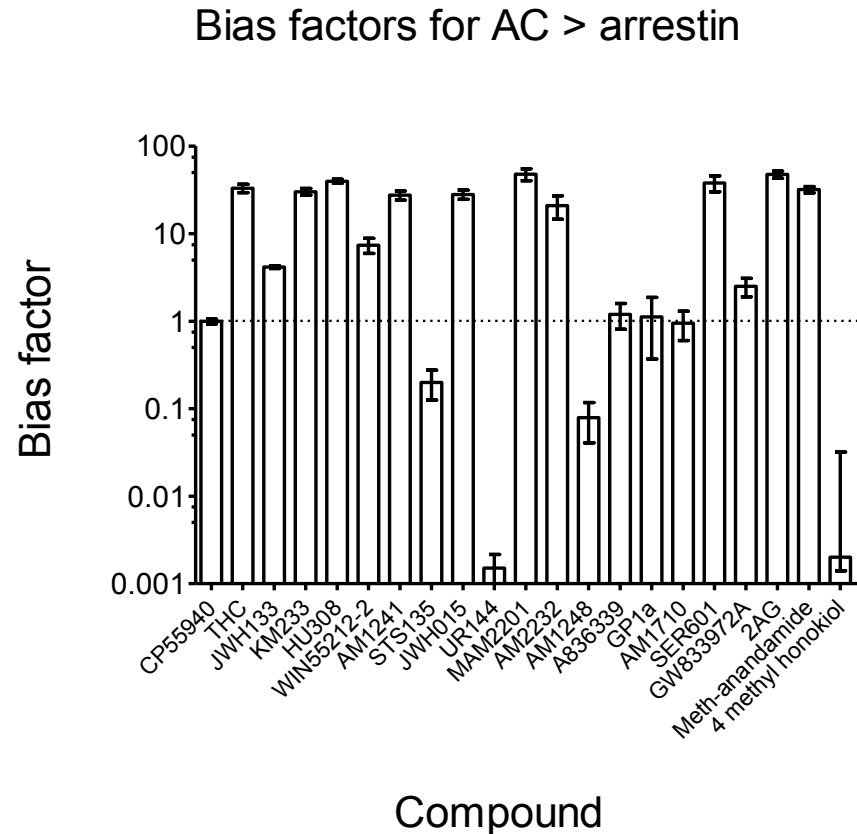

**Fig. 6**

**Supplementary Fig. 6** Bar graph depicting bias factors for select active compounds for inhibition of adenylyl cyclase compared to  $\beta$  arrestin recruitment
